# Supplementary material
Source: PubMed Central journal article supplement (PMC5909187)
Supplement: NIHMS911266-supplement-3.pdf [file NIHMS911266-supplement-3.pdf]

## Supplementary Table 1.

### A. Single Cpf1 crRNAs and SpCas9 gRNAs

| Name               | Spacer Sequence with <b>Cpf1 PAM</b> | Genomic coordinates         |
|--------------------|--------------------------------------|-----------------------------|
| HBB_1 crRNA (H1)   | <b>TTTG</b> TACTGATGGTATGGGGCCAA     | Chr11: 5248505 - 5248528    |
| HBB_2 crRNA (H2)   | <b>TTTGA</b> AGTCCAACCTCCTAAGCCAG    | Chr11: 5248452 - 5248475    |
| HBB_3 crRNA (H3)   | <b>TTTGCA</b> AGTGTATTTACGTAATAT     | Chr11: 5248550 - 5248573    |
| AR_1 crRNA (A1)    | <b>TTTGAG</b> AGTCTGGATGAGAAATGC     | ChrX: 66763209 - 66763232   |
| AR_2 crRNA (A2)    | <b>TTTCT</b> ACCCTCTTCTCTGCCTTTC     | ChrX: 66763260 - 66763283   |
| AR_3 crRNA (A3)    | <b>TTTGCT</b> CTAGGAACCCTCAGCCCC     | ChrX: 66763299 - 66763322   |
| NPY1R_1 crRNA (N1) | <b>TTTCA</b> AGCCTCGGGAAACTGCCCT     | Chr4: 164254005 - 164254028 |
| NPY1R_2 crRNA (N2) | <b>TTTCTTT</b> GTTTGCAGGTCAGTGCC     | Chr4: 164254048 - 164254071 |
| NPY1R_3 crRNA (N3) | <b>TTTGGG</b> CTGGCGCTCGAGCTCTCC     | Chr4: 164254099 - 164254122 |
| CD22_1_crRNA       | <b>TTTCCT</b> CCTCAATATCTATGTGCT     | Chr19: 35819609 -35819632   |
| CD22_2_crRNA       | <b>TTTCAT</b> CATAGGCATAAATGGTGG     | Chr19: 35819677- 35819700   |
| CD22_3_crRNA       | <b>TTTATG</b> CCTATGATGAAAAGAGTG     | Chr19: 35819683 -35819706   |
| CD22_4_crRNA       | <b>TTTAGT</b> GACACCATCCAGTTATTA     | Chr19: 35819714- 35819737   |
| CD22_5_crRNA       | <b>TTTGTA</b> GTTTAGTGACACCATCCA     | Chr19: 35819721- 35819744   |
| CD22_6_crRNA       | <b>TTTCAG</b> CGGGCTGCAGTTCTCCTG     | Chr19: 35819769 -35819792   |
| CD22_7_crRNA       | <b>TTTCTG</b> AGAGCTGGGTAGAGGGG      | Chr19: 35819813- 35819836   |
| CD22_8_crRNA       | <b>TTTCAGA</b> ATGGGCTCCTCCACAAC     | Chr19: 35819839- 35819862   |
| CD22_9_crRNA       | <b>TTTGCA</b> ATATCAGATCAGTTTCAG     | Chr19: 35819857- 35819880   |
| CD22_10_crRNA      | <b>TTTCCG</b> TGTATGGGTTTGCAATAT     | Chr19: 35819871-35819894    |
| CD22_11_crRNA      | <b>TTTCCCC</b> ACTCCCCAGATCACGGT     | Chr19: 35819965- 35819988   |
| CD22_12_crRNA      | <b>TTTCCC</b> CTCCATGGCCACACCCCC     | Chr19: 3582002- 35820046    |
| CD22_13_crRNA      | <b>TTTGCT</b> CTCAGATGCTGCCAGGGT     | Chr19: 3582008- 35820104    |
| CD22_14_crRNA      | <b>TTTCCG</b> CGTGTCTTCCCTCTTCAG     | Chr19: 35820107- 35820130   |
| CD22_15_crRNA      | <b>TTTACCT</b> GTTTCCGCGTGTCTTCC     | Chr19: 35820115-35820138    |
| CD22_16_crRNA      | <b>TTTGCA</b> TTCAACAAGCAAGTTATT     | Chr19: 35820156- 35820179   |
| CD5_1_crRNA        | <b>TTTCCAT</b> GTTGTGTGTTTGTGATT     | Chr11: 60869058- 60869081   |
| CD5_2_crRNA        | <b>TTTCTG</b> TGTTGTGTGTGATCTCCA     | Chr11: 60869176-60869199    |
| CD5_3_crRNA        | <b>TTTGCT</b> AGCAAGTACAAGAGATGG     | Chr11: 60869454- 60869477   |
| CD5_4_crRNA        | <b>TTTGAG</b> CTGACTTTCCACAGGTGG     | Chr11: 60869481- 60869504   |
| CD5_5_crRNA        | <b>TTTGTG</b> AGGGATGAGGTTGGAAGT     | Chr11: 60869504 -60869527   |
| CD5_6_crRNA        | <b>TTTGGC</b> TTTCACTGGAGTCTGCAA     | Chr11: 60869548 -60869571   |
| CD5_7_crRNA        | <b>TTTACT</b> GGAGTCTGCAACAAGAA      | Chr11: 60869554- 60869577   |
| CD5_8_crRNA        | <b>TTTCCC</b> GCCTCTCCCCACCCAGAC     | Chr11: 60869596 - 60869619  |
| CD5_9_crRNA        | <b>TTTGA</b> ATGGCAGCCCTGGCCTCTG     | Chr11: 60869804- 60869827   |
| CD5_10_crRNA       | <b>TTTGA</b> AGTTGAACTGTCAACTTCC     | Chr11: 60869852- 60869875   |
| CD5_11_crRNA       | <b>TTTGCC</b> AGGAGGAAGTTGACAGTT     | Chr11: 60869842- 60869865   |
| CD5_12_crRNA       | <b>TTTACCC</b> AAGGCTGACTCTGGGAT     | Chr11: 60870156 -60870179   |

|              |                                 |                          |
|--------------|---------------------------------|--------------------------|
| CD5_13_crRNA | <b>TTTGGGGCCACTGGGATCCCTGCC</b> | Chr11: 6087021- 60870235 |
| CD5_14_crRNA | <b>TTTACCCTTCCAGTGCAAGAGAGA</b> | Chr11: 60870331 60870354 |
| CD5_15_crRNA | <b>TTTGATGGGGCCCAGACAACTTGA</b> | Chr11: 60870373 60870396 |
| CD5_16_crRNA | <b>TTTAGCAGAGCATTGAGGCCTCCC</b> | Chr11: 60870416 60870439 |

| Name    | Spacer Sequence with <b>SpCas9 PAM</b> | Genomic coordinates       |
|---------|----------------------------------------|---------------------------|
| VEGFA_1 | GTGTGCAGACGGCAGTCACT <b>AGG</b>        | Chr6: 43737352 - 43737374 |
| VEGFA_2 | GAGCAGCGTCTTCGAGAGT <b>AGG</b>         | Chr6: 43737414 - 43737436 |
| VEGFA_3 | GGTGAGTGAGTGTGTGCGT <b>TGG</b>         | Chr6: 43737454- 43737476  |

### B. Multiplex Cpf1 crRNAs targeting a single promoter

| Name      | Pair # | Oligonucleotides sequences to be ordered                     | Orientation |
|-----------|--------|--------------------------------------------------------------|-------------|
| HBB_MST   | Pair1  | AGATTACTGATGGTATGGGGCCAAA                                    | Top         |
|           |        | TAGTAGAAATTTGGCCCCATACCATCAGTA                               | Bottom      |
|           | Pair 2 | ATTTCTACTAAGTGTAGATAAGTCCAACCTCCTA<br>AGCCAGAATTTCTACTAA     | Top         |
|           |        | ATCTACACTTAGTAGAAATTCTGGCTTAGGAG<br>TTGGACTTATCTACTACT       | Bottom      |
|           | Pair 3 | GTGTAGATCAAGTGTATTTACGTAATATAATTT<br>CTACTAAGTGTAGATTTTTTTTA | Top         |
|           |        | AGCTTAAAAAAAATCTACACTTAGTAGAAATTA<br>TATTACGTAATACTACTTG     | Bottom      |
| AR_MST    | Pair1  | AGATAGAGTCTGGATGAGAAATGCA                                    | Top         |
|           |        | TAGTAGAAATTGCATTTCTCATCCAGACTCT                              | Bottom      |
|           | Pair 2 | ATTTCTACTAAGTGTAGATTACCCTCTTCTCTG<br>CCTTTCAATTTCTACTAA      | Top         |
|           |        | ATCTACACTTAGTAGAAATTGAAAGGCAGAGA<br>AGAGGGTAATCTACTACT       | Bottom      |
|           | Pair 3 | GTGTAGATCTCTAGGAACCCTCAGCCCCAATT<br>TCTACTAAGTGTAGATTTTTTTTA | Top         |
|           |        | AGCTTAAAAAAAATCTACACTTAGTAGAAATTG<br>GGGCTGAGGGTTCCCTAGAG    | Bottom      |
| NPY1R_MST | Pair1  | AGATAAGCCTCGGGAAACTGCCCTA                                    | Top         |
|           |        | TAGTAGAAATTAGGGCAGTTTCCCGAGGCTT                              | Bottom      |

|  |        |                                                              |        |
|--|--------|--------------------------------------------------------------|--------|
|  | Pair 2 | ATTTCTACTAAGTGTAGATTTTGTTCAGGTC<br>AGTGCCAATTTCTACTAA        | Top    |
|  |        | ATCTACACTTAGTAGAAATTGGCACTGACCTG<br>CAAACAAAATCTACTACT       | Bottom |
|  | Pair 3 | GTGTAGATGGCTGGCGCTCGAGCTCTCCAAT<br>TTCTACTAAGTGTAGATTTTTTTTA | Top    |
|  |        | AGCTTAAAAAAAATCTACACTTAGTAGAAATTG<br>GAGAGCTCGAGCGCCAGCC     | Bottom |

### C. Multiplex Cpf1 crRNAs targeting multiple promoters

| Name                 | Pair # | Oligonucleotides sequences to be ordered                    | Orientation |
|----------------------|--------|-------------------------------------------------------------|-------------|
| HBB_AR_NPY1R<br>_MST | Pair 1 | AGATTACTGATGGTATGGGGCCAAA                                   | Top         |
|                      |        | TAGTAGAAATTTGGCCCCATACCATCAGTA                              | Bottom      |
|                      | Pair 2 | ATTTCTACTAAGTGTAGATCTCTAGGAACCCTC<br>AGCCCCAATTTCTACTAA     | Top         |
|                      |        | ATCTACACTTAGTAGAAATTGGGGCTGAGGGT<br>TCCTAGAGATCTACTACT      | Bottom      |
|                      | Pair 3 | GTGTAGATAAGCCTCGGGAACTGCCCTAATT<br>TCTACTAAGTGTAGATTTTTTTTA | Top         |
|                      |        | AGCTTAAAAAAAATCTACACTTAGTAGAAATTA<br>GGGCAGTTTCCCGAGGCTT    | Bottom      |

### Supplementary Table 2.

| Primer name | Sequence                 | Orientation | Target Gene  | Purpose |
|-------------|--------------------------|-------------|--------------|---------|
| oET_173     | ATGGTGAGCAGAGTGCCCTATC   | Forward     | <i>NPY1R</i> | RT-qPCR |
| oET_174     | ATGGTCCCTGGCAGTCTCCAAA   | Reverse     |              |         |
| oET_175     | CCATCGGACTCTCATAGGTTGTC  | Forward     | <i>AR</i>    |         |
| oET_176     | GACCTGTACTTATTGTCTCTCATC | Reverse     |              |         |
| oET_225     | GCACGTGGATCCTGAGAACT     | Forward     | <i>HBB</i>   |         |
| oET_226     | ATTGGACAGCAAGAAAGCGAG    | Reverse     |              |         |

| qPCR condition | Number of Cycle | Temperature(°C) | Time(sec) |
|----------------|-----------------|-----------------|-----------|
| Denaturation   | 1               | 95              | 20        |
| Amplification  | 45              | 95              | 3         |
|                |                 | 60              | 30        |

## Supplementary Note 1

### Initial characterization of dLbCpf1- and dAsCpf1-based activators

Initial GFP reporter-based assay experiments showed that a “dead” Cpf1 from *Lachnospiraceae* bacterium (**dLbCpf1**)-VPR fusion induced higher levels of gene activation than a “dead” *Acidaminococcus* sp. BV3L6 Cpf1 (**dAsCpf1**)-VPR fusion (**Supplementary Figs. 1a – 1c**). This difference is consistent with previous reports from our group showing that LbCpf1 generally exhibits higher genome-editing activities than AsCpf1 in human cells<sup>1</sup>. Western blots performed with these fusions showed only modestly lower expression of the dAsCpf1-VPR compared with dLbCpf1-VPR (**Supplementary Fig. 1d**). Based on these results, we chose to use the dLbCpf1 protein for building activators.

### Attempts to optimize MST crRNA-mediated transcriptional activation

We attempted to optimize the activities of MST crRNAs relative to single individually expressed crRNAs and focused on dLbCpf1-VPR because as a single protein system (as opposed to the two-protein drug-inducible systems) it has fewer parameters to vary. We altered the relative and absolute amounts of plasmids encoding crRNAs and dLbCpf1-VPR protein and also tested more extended post-transfection time points but did not observe any substantial improvements relative to our initial experimental conditions (compare **Supplementary Fig. 4** to **Fig. 2d**). For example, for the MST crRNA targeted to the *NPY1R* gene, the level of activation consistently remained between ~45% and 80% of that observed with the individually expressed crRNA across all biological replicates. For the *HBB* and *AR* genes, matched single individually

expressed and MST crRNAs still showed comparable activation levels across the different optimization conditions. We conclude from these results that differences observed between single and MST crRNAs are likely target site-dependent and that further optimization will be required to achieve consistently equivalent activities (e.g., changes to MST crRNA transcript architecture or other alterations to the activators).

## Supplementary Note 2.

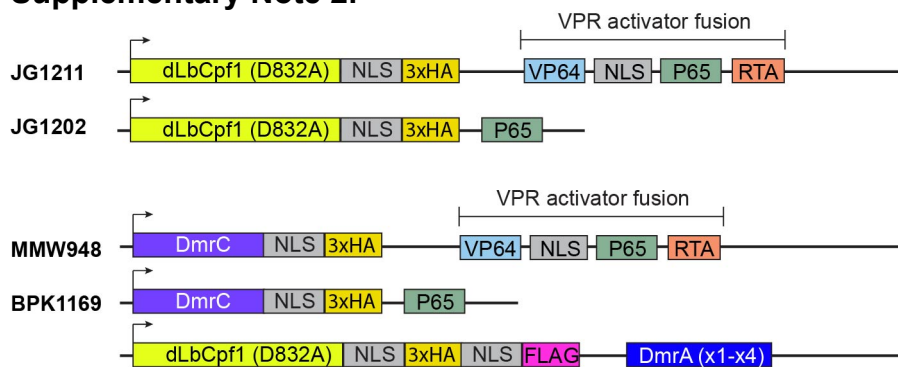

|    | Name    | Addgene # | Description                                             |
|----|---------|-----------|---------------------------------------------------------|
| 1  | MMW1578 | TBD       | pCAG-human dLbCpf1(D832A)-NLS-3xHA                      |
| 2  | BPK1169 | TBD       | pCAG-DmrC-NLS-FLAG-P65                                  |
| 3  | MMW948  | TBD       | pCAG-DmrC-NLS-FLAG-VPR                                  |
| 4  | JG1202  | TBD       | pCAG-human dLbCpf1(D832A)-NLS-3xHA-p65                  |
| 5  | JG1211  | TBD       | pCAG-human dLbCpf1(D832A)-NLS-3xHA-VPR                  |
| 6  | JG674   | TBD       | pCAG-human dLbCpf1(D832A)-NLS-3xHA-DmrA(X1)             |
| 7  | JG676   | TBD       | pCAG-human dLbCpf1(D832A)-NLS-3xHA-DmrA(X2)             |
| 8  | JG693   | TBD       | pCAG-human dLbCpf1(D832A)-NLS-3xHA-DmrA(X3)             |
| 9  | YET1000 | TBD       | pCAG-human dLbCpf1(D832A)-NLS-3xHA-DmrA(X4)             |
| 10 | BPK3082 | 78742     | pU6-LbCpf1-crRNA-BsmBIcassette                          |
| 11 | BPK617  | TBD       | pCAG-NLS-human-dSpCas9(D10A/H840)-NLS(SV40)-3xFLAG-VP64 |
| 12 | BPK1160 | TBD       | pCAG-NLS-human-dSpCas9(D10A/H840)-NLS(SV40)-3xFLAG-p65  |
| 13 | BPK278  | TBD       | pCAG-VP64-human-dSpCas9(D10A/H840)-NLS(SV40)-3xFLAG     |
| 14 | BPK1163 | TBD       | pCAG-p65-human-dSpCas9(D10A/H840)-NLS(SV40)-3xFLAG      |

|    |         |     |                                                             |
|----|---------|-----|-------------------------------------------------------------|
| 15 | BPK1019 | TBD | pCAG-NLS-human-dSpCas9(D10A/H840)-NLS(SV40)-3xFLAG-DmrA     |
| 16 | BPK1033 | TBD | pCAG-NLS-human-dSpCas9(D10A/H840)-NLS(SV40)-3xFLAG-DmrA(x2) |
| 17 | BPK1040 | TBD | pCAG-NLS-human-dSpCas9(D10A/H840)-NLS(SV40)-3xFLAG-DmrA(x3) |
| 18 | BPK1179 | TBD | pCAG-NLS-human-dSpCas9(D10A/H840)-NLS(SV40)-3xFLAG-DmrA(x4) |
| 19 | BPK975  | TBD | pCAG-DmrA-NLS-human-dSpCas9(D10A/H840)-NLS(SV40)-3xFLAG     |
| 20 | BPK976  | TBD | pCAG-DmrA(x2)-NLS-human-dSpCas9(D10A/H840)-NLS(SV40)-3xFLAG |
| 21 | BPK1143 | TBD | pCAG-DmrA(x3)-NLS-human-dSpCas9(D10A/H840)-NLS(SV40)-3xFLAG |
| 22 | BPK1147 | TBD | pCAG-DmrA(x4)-NLS-human-dSpCas9(D10A/H840)-NLS(SV40)-3xFLAG |
| 23 | JKNp44  | TBD | pHR-SFFV-HA-NLS-dSpCas9(D10A/H840)-VPR-2PA-BFP              |
| 24 | JKNp47  | TBD | pHR-SFFV-HA-NLS-dLbCpf1(D832A)-VPR-2PA-BFP                  |
| 25 | JKNp49  | TBD | pHR-SFFV-HA-NLS-dAsCpf1(D908A/E993A)-VPR-2PA-BFP            |

## 1. MMW1578: CAG-human dLbCpf1(D832A)-NLS-3xHA

Human codon optimized dLbCpf1: **bold**, NLS: *italic*, 3xHA: lower case

**ATGAGCAAGCTGGAGAAGTTTACAAACTGCTACTCCCTGTCTAAGACCCTGAGGT**  
**TCAAGGCCATCCCTGTGGGCAAGACCCAGGAGAACATCGACAATAAGCGGCTGC**  
**TGGTGGAGGACGAGAAGAGAGCCGAGGATTATAAGGGCGTGAAGAAGCTGCTG**  
**GATCGCTACTATCTGTCTTTTATCAACGACGTGCTGCACAGCATCAAGCTGAAGA**  
**ATCTGAACAATTACATCAGCCTGTTCCGGAAGAAAACCAGAACCAGAGAAGGAGA**  
**ATAAGGAGCTGGAGAACCTGGAGATCAATCTGCGGAAGGAGATCGCCAAGGCCT**  
**TCAAGGGCAACGAGGGCTACAAGTCCCTGTTTAAAGAAGGATATCATCGAGACAA**  
**TCCTGCCAGAGTTCCTGGACGATAAGGACGAGATCGCCCTGGTGAACAGCTTCA**  
**ATGGCTTTACACAGCCTTACCAGGCTTCTTTGATAACAGAGAGAATATGTTTTCC**  
**GAGGAGGCAAGAGCACATCCATCGCCTTCAGGTGTATCAACGAGAATCTGACC**  
**CGCTACATCTCTAATATGGACATCTTCGAGAAGGTGGACGCCATCTTTGATAAGC**  
**ACGAGGTGCAGGAGATCAAGGAGAAGATCCTGAACAGCGACTATGATGTGGAGG**  
**ATTTCTTTGAGGGCGAGTTCTTTAACTTTGTGCTGACACAGGAGGGCATCGACGT**  
**GTATAACGCCATCATCGGCGGCTTCGTGACCGAGAGCGGCGAGAAGATCAAGGG**  
**CCTGAACGAGTACATCAACCTGTATAATCAGAAAACCAAGCAGAAGCTGCCTAA**  
**GTTTAAAGCCACTGTATAAGCAGGTGCTGAGCGATCGGGAGTCTCTGAGCTTCTAC**  
**GGCGAGGGCTATACATCCGATGAGGAGGTGCTGGAGGTGTTTAGAAACACCCTG**  
**AACAAGAACAGCGAGATCTTCAGCTCCATCAAGAAGCTGGAGAAGCTGTTCAAG**  
**AATTTTGACGAGTACTCTAGCGCCGGCATCTTTGTGAAGAACGGCCCCGCCATCA**  
**GCACAATCTCCAAGGATATCTTCGGCGAGTGAACGTGATCCGGGACAAGTGGA**  
**ATGCCGAGTATGACGATATCCACCTGAAGAAGAAGGCCGTGGTGACCGAGAAGT**  
**ACGAGGACGATCGGAGAAAGTCCTTCAAGAAGATCGGCTCCTTTTCTCTGGAGCA**  
**GCTGCAGGAGTACGCCGACCCGATCTGTCTGTGGTGGAGAAGCTGAAGGAGAT**  
**CATCATCCAGAAGGTGGATGAGATCTACAAGGTGTATGGCTCCTCTGAGAAGCTG**  
**TTCGACGCCGATTTTGTGCTGGAGAAGAGCCTGAAGAAGAACGACGCCGTGGTG**  
**GCCATCATGAAGGACCTGCTGGATTCTGTGAAGAGCTTCGAGAATTACATCAAGG**  
**CCTTCTTTGGCGAGGGCAAGGAGACAAACAGGGACGAGTCCTTCTATGGCGATTT**  
**TGTGCTGGCCTACGACATCCTGCTGAAGGTGGACCACATCTACGATGCCATCCGC**  
**AATTATGTGACCCAGAAGCCCTACTCTAAGGATAAGTTCAAGCTGTATTTTCAGAA**

CCCTCAGTTCATGGGCGGCTGGGACAAGGATAAGGAGACAGACTATCGGGCCAC  
CATCCTGAGATACGGCTCCAAGTACTATCTGGCCATCATGGATAAGAAGTACGCC  
AAGTGCCTGCAGAAGATCGACAAGGACGATGTGAACGGCAATTACGAGAAGATC  
AACTATAAGCTGCTGCCCGGCCCTAATAAGATGCTGCCAAAGGTGTTCTTTTCTA  
AGAAGTGGATGGCCTACTATAACCCAGCGAGGACATCCAGAAGATCTACAAGA  
ATGGCACATTCAAGAAGGGCGATATGTTTAACTGAATGACTGTCACAAGCTGAT  
CGACTTCTTTAAGGATAGCATCTCCCGGTATCCAAAGTGGTCCAATGCCTACGAT  
TTCAACTTTTCTGAGACAGAGAAGTATAAGGACATCGCCGGCTTTTACAGAGAGG  
TGGAGGAGCAGGGCTATAAGGTGAGCTTCGAGTCTGCCAGCAAGAAGGAGGTG  
GATAAGCTGGTGGAGGAGGGCAAGCTGTATATGTTCCAGATCTATAACAAGGACT  
TTTCCGATAAGTCTCACGGCACACCCAATCTGCACACCATGTACTTCAAGCTGCT  
GTTTGACGAGAACAATCACGGACAGATCAGGCTGAGCGGAGGAGCAGAGCTGTT  
CATGAGGCGCGCCTCCCTGAAGAAGGAGGAGCTGGTGGTGCACCCAGCCAACTC  
CCCTATCGCCAACAAGAATCCAGATAATCCCAAGAAAACCACAACCCTGTCCTAC  
GACGTGTATAAGGATAAGAGGTTTTCTGAGGACCAGTACGAGCTGCACATCCCAA  
TCGCCATCAATAAGTGCCCAAGAACATCTTCAAGATCAATACAGAGGTGCGCGT  
GCTGCTGAAGCACGACGATAACCCCTATGTGATCGGCATCGCCAGGGGCGAGCG  
CAATCTGCTGTATATCGTGGTGGTGGACGGCAAGGGCAACATCGTGGAGCAGTA  
TTCCCTGAACGAGATCATCAACAACCTTCAACGGCATCAGGATCAAGACAGATTAC  
CACTCTCTGCTGGACAAGAAGGAGAAGGAGAGGTTTCGAGGCCCGCCAGAAGTG  
GACCTCCATCGAGAATATCAAGGAGCTGAAGGCCGGCTATATCTCTCAGGTGGT  
GCACAAGATCTGCGAGCTGGTGGAGAAGTACGATGCCGTGATCGCCCTGGAGGA  
CCTGAAGTCTGGCTTTAAGAATAGCCGCGTGAAGGTGGAGAAGCAGGTGTATCA  
GAAGTTCGAGAAGATGCTGATCGATAAGCTGAACTACATGGTGGACAAGAAGTC  
TAATCCTTGTGCAACAGGCGGCGCCCTGAAGGGCTATCAGATCACCAATAAGTTC  
GAGAGCTTTAAGTCCATGTCTACCCAGAACGGCTTCATCTTTTACATCCCTGCCTG  
GCTGACATCCAAGATCGATCCATCTACCGGCTTTGTGAACCTGCTGAAAACCAAG  
TATACCAGCATCGCCGATTCCAAGAAGTTCATCAGCTCCTTTGACAGGATCATGT  
ACGTGCCCGAGGAGGATCTGTTGAGTTTGGCCCTGGACTATAAGAACTTCTCTCG  
CACAGACGCCGATTACATCAAGAAGTGGAAAGCTGTAATCCTACGGCAACCGGAT  
CAGAATCTTCCGGAATCCTAAGAAGAACAACGTGTTGACTGGGAGGAGGTGTG  
CCTGACCAGCGCCTATAAGGAGCTGTTCAACAAGTACGGCATCAATTATCAGCAG  
GGCGATATCAGAGCCCTGCTGTGCGAGCAGTCCGACAAGGCCTTCTACTTAGCT  
TTATGGCCCTGATGAGCCTGATGCTGCAGATGCGGAACAGCATCACAGGCCGCA  
CCGACGTGGATTTTCTGATCAGCCCTGTGAAGAACTCCGACGGCATCTTCTACGA  
TAGCCGGAAGTATGAGGCCAGGAGAATGCCATCCTGCCAAAGAACGCCGACGC  
CAATGGCGCCTATAACATCGCCAGAAAGGTGCTGTGGGCCATCGGCCAGTTCAA  
GAAGGCCGAGGACGAGAAGCTGGATAAGGTGAAGATCGCCATCTCTAACAAGGA  
GTGGCTGGAGTACGCCAGACCAGCGTGAAGCACAAAAGGCCGGCGGCCACGAA  
AAAGGCCGGCCAGGCCAAAAAAGAAAAAGGGATCCtaccatacgatgtccagattacgcttatccc  
tacgacgtgcctgattatgcataccatgatgtccccgactatgccTAA

## 2. BPK1169: CAG-DmrC-NLS-FLAG-P65

DmrC: **bold**, NLS-Flag: *italic*, P65: lower case

ATGGGATCCAGAATCCTCTGGCATGAGATGTGGCATGAAGGCCTGGAAGAGGCA  
TCTCGTTTGTACTTTGGGGAAAGGAACGTGAAAGGCATGTTTGAGGTGCTGGAGC  
CCTTGATGCTATGATGGAACGGGGACCCAGACTCTGAAGGAAACATCCTTTAA  
TCAGGCCTATGGTCGAGATTTAATGGAGGCCCAAGAGTGGTGCAGGAAGTACAT

**GAAATCAGGGAATGTCAAGGACCTCCTCCAAGCCTGGGACCTCTATTATCATGTG  
TTCCGACGAATCTCAAAGGGCGGCGGATCCCCAAGAAGAAGAGGAAAGTCTCGA  
GCGACTACAAAGACCATGACGGTGATTATAAAGATCATGACATCGATTACAAGGAT  
GACGATGACAAGGCTGCAGGAGGCGGTGGAAGCGG**Gatggagtccagtacctgccagataca  
gacgatcgtcaccggattgaggagaaacgtaaaaggacatatgacacctcaagagcatcatgaagaagagtcctttca  
gcgaccaccgacccccggcctccacctgacgcattgctgtgccttcccgcagctcagcttctgtcccaagccagcac  
cccagccctatcccttacgtcatccctgagcaccatcaactatgatgagttcccaccatgggtttccttctgggcagatcag  
ccaggcctcggccttgccccggccccctcccgaagtctgccccaggctccagcccctgcccctgctccagccatggtatc  
agctctggcccaggccccagcccctgtcccagtctagccccaggccctcctcaggctgtggccccacctgcccccaagc  
ccaccaggctggggaaggaacgctgtcagaggccctgctgcagctgcagttgatgatgaagacctgggggcttgctt  
ggcaacagcacagaccagctgtgttcacagacctggcatccgtcgataactccgagtttcagcagctgctgaaccaggg  
catacctgtggccccacacaactgagccatgctgatggagtaccctgaggctataactcgcctagtgcagggggccc  
agaggccccccgaccagctcctgctccactggggggccccggggctcccgaatggcctccttcaggagatgaagacttc  
tcctccattgcgacatggacttctcagccctgctgagtcagatcagctctTAA

### 3. MMW948: CAG-DmrC-NLS-FLAG-VPR

DmrC: **bold**, NLS-Flag: *italic*, VP64: **red**, NLS: *italic and underline*, p65: **blue**, Rta: **orange**

ATGGGATCCAGAATCCTCTGGCATGAGATGTGGCATGAAGGCCTGGAAGAGGCA  
TCTCGTTTGTACTTTGGGGAAAGGAACGTGAAAGGCATGTTTGAGGTGCTGGAGC  
CCTTGCATGCTATGATGGAACGGGGACCCAGACTCTGAAGGAAACATCCTTTAA  
TCAGGCCTATGGTCGAGATTTAATGGAGGCCAAGAGTGGTGCAGGAAGTACAT  
**GAAATCAGGGAATGTCAAGGACCTCCTCCAAGCCTGGGACCTCTATTATCATGTG  
TTCCGACGAATCTCAAAGGGCGGCGGATCCCCAAGAAGAAGAGGAAAGTCTCGA  
GCGACTACAAAGACCATGACGGTGATTATAAAGATCATGACATCGATTACAAGGAT  
GACGATGACAAGGCTGCAGGAGGCGGTGGAAGCGGTCGGAGGCCAGCGGTTCC  
GGACGGGCT****GACGCATTGGACGATTTT****GATCTGGATATGCTGGGAAGTGACGCC  
TCGATGATTTTGACCTTGACATGCTTGGTTCCGATGCCCTTGATGACTTTGACCTCG  
ACATGCTCGGCAGTGACGCCCTTGATGATTTCGACCTGGACATGCTG**ATTAActCT  
AGAAGTTCCGGATCTCCGAAAAAGAAACGCAAAGTTGGTAGCCAGTACCTGCCCGA  
CACCGACGACCGGCACCGGATCGAGGAAAAGCGGAAGCGGACCTACGAGACATT  
CAAGAGCATCATGAAGAAGTCCCCCTCAGCGGCCCCACCGACCCTAGACCTCCA  
CCTAGAAGAATCGCCGTGCCAGCAGATCCAGCGCCAGCGTGCCAAAACCTGCC  
CCCAGCCTTACCCCTTACCAGCAGCCTGAGCACCATCAACTACGACGAGTTCCT  
ACCATGGTGTTCGCCAGCGGCCAGATCTCTCAGGCCTCTGCTCTGGCTCCAGCCC  
CTCCTCAGGTGCTGCCTCAGGCTCCTGCTCCTGCACCAGCTCCAGCCATGGTGT  
TGCACTGGCTCAGGCACCAGCACCCGTGCCTGTGCTGGCTCCTGGACCTCCACAG  
GCTGTGGCTCCACCAGCCCCTAAAC**CTACACAGGCCGGCGAGGGCACACTGTCTG  
AAGCTCTGCTGCAGCTGCAGTTCGACGACGAGGATCTGGGAGCCCTGCTGGGAAA  
CAGCACCGATCCTGCCGTGTTACCGACCTGGCCAGCGTGGACAACAGCGAGTTC  
CAGCAGCTGCTGAACCAGGGCATCCCTGTGGCCCTCACACCACCGAGCCATGC  
TGATGGAATACCCCGAGGCCATCACCCGGCTCGTGACAGGCGCTCAGAGGCCCTCC  
TGATCCAGCTCCTGCCCTCTGGGAGCACAGGCCTGCCTAATGGACTGCTGTCT  
GGCGACGAGGACTTCAGCTCTATCGCCGATATGGATTTCTCAGCCTTGCTGGGCTC  
TGGCAGCGGCAGC****CGGGATTCCAGGGAAGGGATGTTTTTGCCGAAGCCTGAGGC  
CGGCTCCGCTATTAGTGACGTGTTT****GAGGGCCGCGAGGTGTGCCAGCCAAAACGA**



ATCCGGCCATTTTCATCCTCCAGGAAGTCCATGGGCCAACCGCCCACTCCCCGCCA  
GCCTCGCACCAACACCAACCGGTCCAGTACATGAGCCAGTCGGGTCCTGACCCC  
GGCACCAGTCCCTCAGCCACTGGATCCAGCGCCCGCAGTGAATCCCGAGGCCAGT  
CACCTGTTGGAGGATCCCGATGAAGAGACGAGCCAGGCTGTCAAAGCCCTTCGGG  
AGATGGCCGATACTGTGATTCCCCAGAAGGAAGAGGCTGCAATCTGTGGCCAAAT  
GGACCTTTCCCATCCGCCCCCAAGGGGCCATCTGGATGAGCTGACAACCACACTT  
GAGTCCATGACCGAGGATCTGAACCTGGACTCACCCCTGACCCCGGAATTGAACG  
AGATTCTGGATACCTTCCGTAACGACGAGTGCCTCTTGCATGCCATGCATATCAGC  
ACAGGACTGTCCATCTTCGACACATCTCTGTTT

#### 4. JG1202: CAG-human dLbCpf1(D832A)-NLS-3xHA-P65

Human codon optimized dLbCpf1: **bold**, NLS: *italic*, 3xHA: lower case, P65: lower case and **bold**

ATGAGCAAGCTGGAGAAGTTTACAAACTGCTACTCCCTGTCTAAGACCCTGAGGT  
TCAAGGCCATCCCTGTGGGCAAGACCCAGGAGAACATCGACAATAAGCGGCTGC  
TGGTGGAGGACGAGAAGAGAGCCGAGGATTATAAGGGCGTGAAGAAGCTGCTG  
GATCGCTACTATCTGTCTTTTATCAACGACGTGCTGCACAGCATCAAGCTGAAGA  
ATCTGAACAATTACATCAGCCTGTTCCGGAAGAAAACCAGAACCAGAGAAGGAGA  
ATAAGGAGCTGGAGAACCCTGGAGATCAATCTGCGGAAGGAGATCGCCAAGGCCT  
TCAAGGGCAACGAGGGCTACAAGTCCCTGTTAAGAAGGATATCATCGAGACAA  
TCCTGCCAGAGTTCCTGGACGATAAGGACGAGATCGCCCTGGTGAACAGCTTCA  
ATGGCTTTACCACAGCCTTACCAGGCTTCTTTGATAACAGAGAGAATATGTTTTCC  
GAGGAGGCCAAGAGCACATCCATCGCCTTCAGGTGTATCAACGAGAATCTGACC  
CGCTACATCTCTAATATGGACATCTTCGAGAAGGTGGACGCCATCTTTGATAAGC  
ACGAGGTGCAGGAGATCAAGGAGAAGATCCTGAACAGCGACTATGATGTGGAGG  
ATTTCTTTGAGGGCGAGTTCTTTAACTTTGTGCTGACACAGGAGGGCATCGACGT  
GTATAACGCCATCATCGGCGGCTTCGTGACCGAGAGCGGCGAGAAGATCAAGGG  
CCTGAACGAGTACATCAACCTGTATAATCAGAAAACCAAGCAGAAGCTGCCTAA  
GTTTAAGCCACTGTATAAGCAGGTGCTGAGCGATCGGGAGTCTCTGAGCTTCTAC  
GGCGAGGGCTATACATCCGATGAGGAGGTGCTGGAGGTGTTTAGAAACACCCTG  
AACAAGAACAGCGAGATCTTCAGCTCCATCAAGAAGCTGGAGAAGCTGTTCAAG  
AATTTTGACGAGTACTCTAGCGCCGGCATCTTTGTGAAGAACGGCCCCGCCATCA  
GCACAATCTCCAAGGATATCTTCGGCGAGTGGAACGTGATCCGGGACAAGTGGA  
ATGCCGAGTATGACGATATCCACCTGAAGAAGAAGGCCGTGGTGACCGAGAAGT  
ACGAGGACGATCGGAGAAAGTCCTTCAAGAAGATCGGCTCCTTTTCTCTGGAGCA  
GCTGCAGGAGTACGCCGACGCCGATCTGTCTGTGGTGGAGAAGCTGAAGGAGAT  
CATCATCCAGAAGGTGGATGAGATCTACAAGGTGTATGGCTCCTCTGAGAAGCTG  
TTCGACGCCGATTTTGTGCTGGAGAAGAGCCTGAAGAAGAACGACGCCGTGGTG  
GCCATCATGAAGGACCTGCTGGATTCTGTGAAGAGCTTCGAGAATTACATCAAGG  
CCTTCTTTGGCGAGGGCAAGGAGACAAACAGGGACGAGTCTTCTATGGCGATTT  
TGTGCTGGCCTACGACATCCTGCTGAAGGTGGACCACATCTACGATGCCATCCGC  
AATTATGTGACCCAGAAGCCCTACTCTAAGGATAAGTTCAAGCTGTATTTTCAGAA  
CCCTCAGTTCATGGGCGGCTGGGACAAGGATAAGGAGACAGACTATCGGGCCAC  
CATCCTGAGATACGGCTCCAAGTACTATCTGGCCATCATGGATAAGAAGTACGCC  
AAGTGCCTGCAGAAGATCGACAAGGACGATGTGAACGGCAATTACGAGAAGATC  
AACTATAAGCTGCTGCCCGGCCCTAATAAGATGCTGCCAAAGGTGTTCTTTTCTA

AGAAGTGGATGGCCTACTATAACCCCAGCGAGGACATCCAGAAGATCTACAAGA  
ATGGCACATTCAAGAAGGGCGATATGTTTAACTGAATGACTGTCACAAGCTGAT  
CGACTTCTTTAAGGATAGCATCTCCCGGTATCCAAAGTGGTCCAATGCCTACGAT  
TTCAACTTTTCTGAGACAGAGAAGTATAAGGACATCGCCGGCTTTTACAGAGAGG  
TGGAGGAGCAGGGCTATAAGGTGAGCTTCGAGTCTGCCAGCAAGAAGGAGGTG  
GATAAGCTGGTGGAGGAGGGCAAGCTGTATATGTTCCAGATCTATAACAAGGACT  
TTTCCGATAAGTCTCACGGCACACCCAATCTGCACACCATGTACTTCAAGCTGCT  
GTTTGACGAGAACAATCACGGACAGATCAGGCTGAGCGGAGGAGCAGAGCTGTT  
CATGAGGCGCGCCTCCCTGAAGAAGGAGGAGCTGGTGGTGCACCCAGCCAACCTC  
CCCTATCGCCAACAAGAATCCAGATAATCCCAAGAAAACCACAACCCTGTCCTAC  
GACGTGTATAAGGATAAGAGGTTTTCTGAGGACCAGTACGAGCTGCACATCCCAA  
TCGCCATCAATAAGTGCCCAAGAACATCTTCAAGATCAATACAGAGGTGCGCGT  
GCTGCTGAAGCACGACGATAACCCCTATGTGATCGGCATCGCCAGGGGCGAGCG  
CAATCTGCTGTATATCGTGGTGGTGGACGGCAAGGGCAACATCGTGGAGCAGTA  
TTCCCTGAACGAGATCATCAACAACCTTCAACGGCATCAGGATCAAGACAGATTAC  
CACTCTCTGCTGGACAAGAAGGAGAAGGAGAGGTTTCGAGGCCCGCCAGAAGCTG  
GACCTCCATCGAGAATATCAAGGAGCTGAAGGCCGGCTATATCTCTCAGGTGGT  
GCACAAGATCTGCGAGCTGGTGGAGAAGTACGATGCCGTGATCGCCCTGGAGGA  
CCTGAAGCTCTGGCTTTAAGAATAGCCGCGTGAAGGTGGAGAAGCAGGTGTATCA  
GAAGTTCGAGAAGATGCTGATCGATAAGCTGAACTACATGGTGGACAAGAAGTC  
TAATCCTTGTGCAACAGGGCGGCCCTGAAGGGCTATCAGATCACCAATAAGTTC  
GAGAGCTTTAAGTCCATGTCTACCCAGAACGGCTTCATCTTTTACATCCCTGCCTG  
GCTGACATCCAAGATCGATCCATCTACCGGCTTTGTGAACCTGCTGAAAACCAAG  
TATACCAGCATCGCCGATTCCAAGAAGTTCATCAGCTCCTTTGACAGGATCATGT  
ACGTGCCCGAGGAGGATCTGTTTCGAGTTTGCCCTGGACTATAAGAACTTCTCTCG  
CACAGACGCCGATTACATCAAGAAGTGGAAGCTGTACTCCTACGGCAACCGGAT  
CAGAATCTTCCGGAATCCTAAGAAGAACAACGTGTTTCGACTGGGAGGAGGTGTG  
CCTGACCAGCGCCTATAAGGAGCTGTTCAACAAGTACGGCATCAATTATCAGCAG  
GGCGATATCAGAGCCCTGCTGTGCGAGCAGTCCGACAAGGCCTTCTACTCTAGCT  
TTATGGCCCTGATGAGCCTGATGCTGCAGATGCGGAACAGCATCACAGGCCGCA  
CCGACGTGGATTTTCTGATCAGCCCTGTGAAGAACTCCGACGGCATCTTCTACGA  
TAGCCGGAAGTATGAGGCCAGGAGAATGCCATCCTGCCAAAGAACGCCGACGC  
CAATGGCGCCTATAACATCGCCAGAAAGGTGCTGTGGGCCATCGGCCAGTTCAA  
GAAGGCCGAGGACGAGAAGCTGGATAAGGTGAAGATCGCCATCTCTAACAAGGA  
GTGGCTGGAGTACGCCAGACCAGCGTGAAGCACAAAAGGCCGGCGGCCACGAA  
AAAGGCCGGCCAGGCCAAAAAAGAAAAAGGGATCCtaccatacagatgtccagattacgcttatccc  
tacgacgtgctgattatgcatacccatatgatgtccccgactatgccGGAAGCgagttccagtacctgccagataca  
gacgatcgtcaccggattgaggagaaacgtaaaggacatatgagacctcaagagcatcatgaagaagagtc  
ctttcagcggaccaccgacccccggcctccacctgcagcattgctgtgccttcccgcagctcagcttctgtcc  
ccaagccagcaccaccagccctatcccttacgtcatccctgagcaccatcaactatgatgagttcccaccatggt  
gtttccttctgggcagatcagccaggcctcgcccttggccccggccccctcccgaagtctgcccaggctccag  
cccctgcccctgctccagcatggtatcagctctggcccaggccccagcccctgtcccagctcctagccccagg  
ccctctcaggctgtggccccacctgcccccaagcccaccaggctggggaaggaacgctgtcagaggccct  
gctgcagctgcagtttgatgatgaagacctgggggcttggcaacagcacagaccagctgtgttcacag  
acctggcatcctgcataactccgagtttcagcagctgctgaaccagggcatacctgtggccccccacacaact  
gagcccatgctgatggagtaccctgaggctataactgcctagtgcaggggcccagaggccccccgaccca  
gctcctgctccactgggggccccgggctccccaatggcctccttcaggagatgaagacttctcctcattgcg  
gacatggacttctcagccctgctgagtcagatcagctctTAA

5. JG1211: CAG-human dLbCpf1(D832A)-NLS-3xHA-VPR

Human codon optimized dLbCpf1: **bold**, NLS: *italic*, 3xHA: lower case, VP64: **red**, NLS: *italic and underline*, p65: **blue**, Rta: **orange**

ATGAGCAAGCTGGAGAAGTTTACAAACTGCTACTCCCTGTCTAAGACCCTGAGGT  
TCAAGGCCATCCCTGTGGGCAAGACCCAGGAGAACATCGACAATAAGCGGCTGC  
TGGTGGAGGACGAGAAGAGAGCCGAGGATTATAAGGGCGTGAAGAAGCTGCTG  
GATCGCTACTATCTGTCTTTTATCAACGACGTGCTGCACAGCATCAAGCTGAAGA  
ATCTGAACAATTACATCAGCCTGTTCCGGAAGAAAACCAGAACCAGAGAAGGAGA  
ATAAGGAGCTGGAGAACCCTGGAGATCAATCTGCGGAAGGAGATCGCCAAGGCCT  
TCAAGGGCAACGAGGGGCTACAAGTCCCTGTTAAGAAGGATATCATCGAGACAA  
TCCTGCCAGAGTTCCTGGACGATAAGGACGAGATCGCCCTGGTGAACAGCTTCA  
ATGGCTTTACCACAGCCTTCACCGGCTTCTTTGATAACAGAGAGAATATGTTTTCC  
GAGGAGGCCAAGAGCACATCCATCGCCTTCAGGTGTATCAACGAGAATCTGACC  
CGCTACATCTCTAATATGGACATCTTCGAGAAGGTGGACGCCATCTTTGATAAGC  
ACGAGGTGCAGGAGATCAAGGAGAAGATCCTGAACAGCGACTATGATGTGGAGG  
ATTTCTTTGAGGGCGAGTTCTTTAACTTTGTGCTGACACAGGAGGGGCATCGACGT  
GTATAACGCCATCATCGGCGGCTTCGTGACCGAGAGCGGCGAGAAGATCAAGGG  
CCTGAACGAGTACATCAACCTGTATAATCAGAAAACCAAGCAGAAGCTGCCTAA  
GTTTAAGCCACTGTATAAGCAGGTGCTGAGCGATCGGGAGTCTCTGAGCTTCTAC  
GGCGAGGGCTATACATCCGATGAGGAGGTGCTGGAGGTGTTTAGAAACACCCTG  
AACAAGAACAGCGAGATCTTCAGCTCCATCAAGAAGCTGGAGAAGCTGTTCAAG  
AATTTTGACGAGTACTCTAGCGCCGGCATCTTTGTGAAGAACGGCCCCGCCATCA  
GCACAATCTCCAAGGATATCTTCGGCGAGTGAACGTGATCCGGGACAAGTGGA  
ATGCCGAGTATGACGATATCCACCTGAAGAAGAAGGCCGTGGTGACCGAGAAGT  
ACGAGGACGATCGGAGAAAGTCCTTCAAGAAGATCGGCTCCTTTTCTCTGGAGCA  
GCTGCAGGAGTACGCCGACCCGATCTGTCTGTGGTGGAGAAGCTGAAGGAGAT  
CATCATCCAGAAGGTGGATGAGATCTACAAGGTGTATGGCTCCTCTGAGAAGCTG  
TTCGACGCCGATTTTGTGCTGGAGAAGAGCCTGAAGAAGAACGACGCCGTGGTG  
GCCATCATGAAGGACCTGCTGGATTCTGTGAAGAGCTTCGAGAATTACATCAAGG  
CCTTCTTTGGCGAGGGCAAGGAGACAAACAGGGACGAGTCCTTCTATGGCGATTT  
TGTGCTGGCCTACGACATCCTGCTGAAGGTGGACCACATCTACGATGCCATCCGC  
AATTATGTGACCCAGAAGCCCTACTCTAAGGATAAGTTCAAGCTGTATTTTCAGAA  
CCCTCAGTTCATGGGCGGCTGGGACAAGGATAAAGGAGACAGACTATCGGGCCAC  
CATCCTGAGATACGGCTCCAAGTACTATCTGGCCATCATGGATAAGAAGTACGCC  
AAGTGCCTGCAGAAGATCGACAAGGACGATGTGAACGGCAATTACGAGAAGATC  
AACTATAAGCTGCTGCCCGGCCCTAATAAGATGCTGCCAAAGGTGTTCTTTTCTA  
AGAAGTGGATGGCCTACTATAACCCCAGCGAGGACATCCAGAAGATCTACAAGA  
ATGGCACATTCAAGAAGGGCGATATGTTTAACTGAATGACTGTCACAAGCTGAT  
CGACTTCTTTAAGGATAGCATCTCCCGGTATCCAAAGTGGTCCAATGCCTACGAT  
TTCAACTTTTCTGAGACAGAGAAGTATAAGGACATCGCCGGCTTTTACAGAGAGG  
TGGAGGAGCAGGGCTATAAGGTGAGCTTCGAGTCTGCCAGCAAGAAGGAGGTG  
GATAAGCTGGTGGAGGAGGGCAAGCTGTATATGTTCCAGATCTATAACAAGGACT  
TTTCCGATAAGTCTCACGGCACACCCAATCTGCACACCATGTACTTCAAGCTGCT  
GTTTGACGAGAACAATCACGGACAGATCAGGCTGAGCGGAGGAGCAGAGCTGTT  
CATGAGGCGCGCCTCCCTGAAGAAGGAGGAGCTGGTGGTGCACCCAGCCAACCTC  
CCCTATCGCCAACAAGAATCCAGATAATCCCAAGAAAACCACAACCCTGTCCTAC  
GACGTGTATAAGGATAAGAGGTTTTCTGAGGACCAGTACGAGCTGCACATCCCAA  
TCGCCATCAATAAGTGCCCCAAGAACATCTTCAAGATCAATACAGAGGTGCGCGT  
GCTGCTGAAGCACGACGATAACCCCTATGTGATCGGCATCGCCAGGGGGCGAGCG  
CAATCTGCTGTATATCGTGGTGGTGGACGGCAAGGGCAACATCGTGGAGCAGTA

TTCCCTGAACGAGATCATCAACAACCTTCAACGGCATCAGGATCAAGACAGATTAC  
CACTCTCTGCTGGACAAGAAGGAGAAGGAGAGGTTTCGAGGCCCGCCAGAAGT  
GACCTCCATCGAGAATATCAAGGAGCTGAAGGCCGGCTATATCTCTCAGGTGGT  
GCACAAGATCTGCGAGCTGGTGGAGAAGTACGATGCCGTGATCGCCCTGGAGGA  
CCTGAACTCTGGCTTTAAGAATAGCCGCGTGAAGGTGGAGAAGCAGGTGTATCA  
GAAGTTCGAGAAGATGCTGATCGATAAGCTGAACTACATGGTGGACAAGAAGTC  
TAATCCTTGTGCAACAGGGCGGCGCCCTGAAGGGCTATCAGATCACCAATAAGTTC  
GAGAGCTTTAAGTCCATGTCTACCCAGAACGGCTTCATCTTTTACATCCCTGCCTG  
GCTGACATCCAAGATCGATCCATCTACCGGCTTTGTGAACCTGCTGAAAACCAAG  
TATACCAGCATCGCCGATTCCAAGAAGTTCATCAGCTCCTTTGACAGGATCATGT  
ACGTGCCCGAGGAGGATCTGTTGAGTTTGCCTGGACTATAAGAACTTCTCTCG  
CACAGACGCCGATTACATCAAGAAGTGGAAAGCTGTAATCCTACGGCAACCGGAT  
CAGAATCTTCCGGAATCCTAAGAAGAACAACGTGTTGACTGGGAGGAGGTGTG  
CCTGACCAGCGCCTATAAGGAGCTGTTCAACAAGTACGGCATCAATTATCAGCAG  
GGCGATATCAGAGCCCTGCTGTGCGAGCAGTCCGACAAGGCCTTCTACTTAGCT  
TTATGGCCCTGATGAGCCTGATGCTGCAGATGCGGAACAGCATCACAGGCCGCA  
CCGACGTGGATTTTCTGATCAGCCCTGTGAAGAACTCCGACGGCATCTTCTACGA  
TAGCCGGAAGTATGAGGCCAGGAGAATGCCATCCTGCCAAAGAACGCCGACGC  
CAATGGCGCCTATAACATCGCCAGAAAGGTGCTGTGGGCCATCGGCCAGTTCAA  
GAAGGCCGAGGACGAGAAGCTGGATAAGGTGAAGATCGCCATCTCTAACAAGGA  
GTGGCTGGAGTACGCCAGACCAGCGTGAAGCACAAAAGGCCGGCGGCCACGAA  
AAAGGCCGGCCAGGCCAAAAAGAAAAGGGATCtaccatacagatgtccagattacgctatccc  
tacgacgtgcctgattatgcataccatgatgtccccgactatgccGAAGCGAGGCCAGCGGTTCCGG  
ACGGGCTGACGCGATTGGACGATTTTGATCTGGATATGCTGGGAAGTGACGCCCTC  
GATGATTTTGACCTTGACATGCTTGGTTGCGATGCCCTTGATGACTTTGACCTCGAC  
ATGCTCGGCAGTGACGCCCTTGATGATTTGACCTGGACATGCTGATTAATCTAG  
AAGTTCGGATCTCCGAAAAAGAAACGCAAAGTTGGTAGCCAGTACCTGCCCGACA  
CCGACGACCGGCACCGGATCGAGGAAAAGCGGAAGCGGACCTACGAGACATTCAA  
GAGCATCATGAAGAAGTCCCCCTTCAGCGGCCCCACCGACCCTAGACCTCCACCT  
AGAAGAATCGCCGTGCCAGCAGATCCAGCGCCAGCGTGCCAAAACCTGCCCCCC  
AGCCTTACCCCTTACCAGCAGCCTGAGCACCATCAACTACGACGAGTTCCCTACC  
ATGGTGTTCCCGAGCGGCCAGATCTCTCAGGCCTCTGCTCTGGCTCCAGCCCTC  
CTCAGGTGCTGCCTCAGGCTCCTGCTCCTGCACCAGCTCCAGCCATGGTGTCTGC  
ACTGGCTCAGGCACCAGCACCCGTGCCTGTGCTGGCTCCTGGACCTCCACAGGCT  
GTGGCTCCACCAGCCCTAAACCTACACAGGCCGGCGAGGGCACACTGTCTGAAG  
CTCTGCTGCAGCTGCAGTTCGACGACGAGGATCTGGGAGCCCTGCTGGGAAACAG  
CACCGATCCTGCCGTGTTACCGACCTGGCCAGCGTGGACAACAGCGAGTTCAG  
CAGCTGCTGAACCAGGGCATCCCTGTGGCCCTCACACCACCGAGCCCATGCTGA  
TGAATAACCCGAGGCCATCACCCGGCTCGTGACAGGCGCTCAGAGGCCTCCTGA  
TCCAGCTCCTGCCCTCTGGGAGCACCAGGCCTGCCTAATGGACTGCTGTCTGGC  
GACGAGGACTTCAGCTCTATCGCCGATATGGATTTCTCAGCCTTGCTGGGCTCTGG  
CAGCGGCAGCCGGGATTCCAGGGAAGGGATGTTTTTGCCGAAGCCTGAGGCCGG  
CTCCGCTATTAGTGACGTGTTTGAGGGCCGCGAGGTGTGCCAGCCAAAACGAATC  
CGGCCATTTTCATCCTCCAGGAAGTCCATGGGCCAACCGCCACTCCCCGCCAGCC  
TCGCACCAACACCAACCGGTCCAGTACATGAGCCAGTCCGGTCACTGACCCCGGC  
ACCAAGTCCCTCAGCCACTGGATCCAGCGCCCGCAGTGAATCCCGAGGCCAGTCA  
CTGTTGGAGGATCCCGATGAAGAGACGAGCCAGGCTGTCAAAGCCCTTCGGGAGA  
TGGCCGATACTGTGATTCCCCAGAAGGAAGAGGCTGCAATCTGTGGCCAAATGGA  
CCTTTCCCATCCGCCCCCAAGGGGCCATCTGGATGAGCTGACAACCACACTTGAGT  
CCATGACCGAGGATCTGAACCTGGACTCACCCCTGACCCCGGAATTGAACGAGATT

CTGGATACCTTCCTGAACGACGAGTGCCTCTTGCATGCCATGCATATCAGCACAGG  
ACTGTCCATCTTCGACACATCTCTGTTT

## 6. JG674: CAG-human dLbCpf1(D832A)-NLS-3xHA-DmrA(X1)

Human codon optimized dLbCpf1: **bold**, NLS: *italic*, 3xHA: lower case, DmrA: lowercase and **bold**

ATGAGCAAGCTGGAGAAGTTTACAAACTGCTACTCCCTGTCTAAGACCCTGAGGT  
TCAAGGCCATCCCTGTGGGCAAGACCCAGGAGAACATCGACAATAAGCGGCTGC  
TGGTGGAGGACGAGAAGAGAGCCGAGGATTATAAGGGCGTGAAGAAGCTGCTG  
GATCGCTACTATCTGTCTTTTATCAACGACGTGCTGCACAGCATCAAGCTGAAGA  
ATCTGAACAATTACATCAGCCTGTTCCGGAAGAAAACCAGAACCAGAGAAGGAGA  
ATAAGGAGCTGGAGAACCCTGGAGATCAATCTGCGGAAGGAGATCGCCAAGGCCT  
TCAAGGGCAACGAGGGCTACAAGTCCCTGTTAAGAAGGATATCATCGAGACAA  
TCCTGCCAGAGTTCCTGGACGATAAGGACGAGATCGCCCTGGTGAACAGCTTCA  
ATGGCTTTACCACAGCCTTCACCGGCTTCTTTGATAACAGAGAGAATATGTTTTCC  
GAGGAGGCCAAGAGCACATCCATCGCCTTCAGGTGTATCAACGAGAATCTGACC  
CGCTACATCTCTAATATGGACATCTTCGAGAAGGTGGACGCCATCTTTGATAAGC  
ACGAGGTGCAGGAGATCAAGGAGAAGATCCTGAACAGCGACTATGATGTGGAGG  
ATTTCTTTGAGGGCGAGTTCTTTAACTTTGTGCTGACACAGGAGGGCATCGACGT  
GTATAACGCCATCATCGGCGGCTTCGTGACCGAGAGCGGCGAGAAGATCAAGGG  
CCTGAACGAGTACATCAACCTGTATAATCAGAAAACCAAGCAGAAGCTGCCTAA  
GTTTAAGCCACTGTATAAGCAGGTGCTGAGCGATCGGGAGTCTCTGAGCTTCTAC  
GGCGAGGGCTATACATCCGATGAGGAGGTGCTGGAGGTGTTTAGAAACACCCTG  
AACAAGAACAGCGAGATCTTCAGCTCCATCAAGAAGCTGGAGAAGCTGTTCAAG  
AATTTTGACGAGTACTCTAGCGCCGGCATCTTTGTGAAGAACGGCCCCGCCATCA  
GCACAATCTCCAAGGATATCTTCGGCGAGTGGAACGTGATCCGGGACAAGTGGA  
ATGCCGAGTATGACGATATCCACCTGAAGAAGAAGGCCGTGGTGACCGAGAAGT  
ACGAGGACGATCGGAGAAAGTCCTTCAAGAAGATCGGCTCCTTTTCTCTGGAGCA  
GCTGCAGGAGTACGCCGACGCCGATCTGTCTGTGGTGGAGAAGCTGAAGGAGAT  
CATCATCCAGAAGGTGGATGAGATCTACAAGGTGTATGGCTCCTCTGAGAAGCTG  
TTCGACGCCGATTTTGTGCTGGAGAAGAGCCTGAAGAAGAACGACGCCGTGGTG  
GCCATCATGAAGGACCTGCTGGATTCTGTGAAGAGCTTCGAGAATTACATCAAGG  
CCTTCTTTGGCGAGGGCAAGGAGACAAACAGGGACGAGTCCTTCTATGGCGATTT  
TGTGCTGGCCTACGACATCCTGCTGAAGGTGGACCACATCTACGATGCCATCCGC  
AATTATGTGACCCAGAAGCCCTACTCTAAGGATAAGTTCAAGCTGTATTTTCAGAA  
CCCTCAGTTCATGGGCGGCTGGGACAAGGATAAAGGAGACAGACTATCGGGCCAC  
CATCCTGAGATACGGCTCCAAGTACTATCTGGCCATCATGGATAAGAAGTACGCC  
AAGTGCTGCAGAAGATCGACAAGGACGATGTGAACGGCAATTACGAGAAGATC  
AACTATAAGCTGCTGCCCGGCCCTAATAAGATGCTGCCAAAGGTGTTCTTTTCTA  
AGAAGTGGATGGCCTACTATAACCCCAGCGAGGACATCCAGAAGATCTACAAGA  
ATGGCACATTCAAGAAGGGCGATATGTTTAACTGAATGACTGTCACAAGCTGAT  
CGACTTCTTTAAGGATAGCATCTCCCGGTATCCAAAGTGGTCCAATGCCTACGAT  
TTCAACTTTTCTGAGACAGAGAAGTATAAGGACATCGCCGGCTTTTACAGAGAGG  
TGGAGGAGCAGGGCTATAAGGTGAGCTTCGAGTCTGCCAGCAAGAAGGAGGTG  
GATAAGCTGGTGGAGGAGGGCAAGCTGTATATGTTCCAGATCTATAACAAGGACT  
TTTCCGATAAGTCTCACGGCACACCCAATCTGCACACCATGTAAGTCAAGCTGCT  
GTTTGACGAGAACAATCACGGACAGATCAGGCTGAGCGGAGGAGCAGAGCTGTT

CATGAGGCGCGCCTCCCTGAAGAAGGAGGAGCTGGTGGTGCACCCAGCCAACTC  
CCCTATCGCCAACAAGAATCCAGATAATCCCAAGAAAACCACAACCCTGTCCTAC  
GACGTGTATAAGGATAAGAGGTTTTCTGAGGACCAGTACGAGCTGCACATCCCAA  
TCGCCATCAATAAGTGCCCAAGAACATCTTCAAGATCAATACAGAGGTGCGCGT  
GCTGCTGAAGCACGACGATAACCCCTATGTGATCGGCATCGCCAGGGGCGAGCG  
CAATCTGCTGTATATCGTGGTGGTGGACGGCAAGGGCAACATCGTGGAGCAGTA  
TTCCCTGAACGAGATCATCAACAACCTTCAACGGCATCAGGATCAAGACAGATTAC  
CACTCTCTGCTGGACAAGAAGGAGAAGGAGAGGTTTCGAGGCCCGCCAGAAGT  
GACCTCCATCGAGAATATCAAGGAGCTGAAGGCCGGCTATATCTCTCAGGTGGT  
GCACAAGATCTGCGAGCTGGTGGAGAAGTACGATGCCGTGATCGCCCTGGAGGA  
CCTGAACTCTGGCTTTAAGAATAGCCGCGTGAAGGTGGAGAAGCAGGTGTATCA  
GAAGTTCGAGAAGATGCTGATCGATAAGCTGAACTACATGGTGGACAAGAAGTC  
TAATCCTTGTGCAACAGGCGGCGCCCTGAAGGGCTATCAGATCACCAATAAGTTC  
GAGAGCTTTAAGTCCATGTCTACCCAGAACGGCTTCATCTTTTACATCCCTGCCTG  
GCTGACATCCAAGATCGATCCATCTACCGGCTTTGTGAACCTGCTGAAAACCAAG  
TATACCAGCATCGCCGATTCCAAGAAGTTCATCAGCTCCTTTGACAGGATCATGT  
ACGTGCCCGAGGAGGATCTGTTGAGTTTGCCTGGACTATAAGAACTTCTCTCG  
CACAGACGCCGATTACATCAAGAAGTGAAGCTGTACTCCTACGGCAACCGGAT  
CAGAATCTTCCGGAATCCTAAGAAGAACAACGTGTTGACTGGGAGGAGGTGTG  
CCTGACCAGCGCCTATAAGGAGCTGTTCAACAAGTACGGCATCAATTATCAGCAG  
GGCGATATCAGAGCCCTGCTGTGCGAGCAGTCCGACAAGGCCTTCTACTTAGCT  
TTATGGCCCTGATGAGCCTGATGCTGCAGATGCGGAACAGCATCACAGGCCGCA  
CCGACGTGGATTTTCTGATCAGCCCTGTGAAGAACTCCGACGGCATCTTCTACGA  
TAGCCGGAACCTATGAGGCCAGGAGAATGCCATCCTGCCAAAGAACGCCGACGC  
CAATGGCGCCTATAACATCGCCAGAAAGGTGCTGTGGGCCATCGGCCAGTTCAA  
GAAGGCCGAGGACGAGAAGCTGGATAAGGTGAAGATCGCCATCTCTAACAAGGA  
GTGGCTGGAGTACGCCAGACCAGCGTGAAGCACAAAAGGCCGGCCGACGAA  
AAAGGCCGGCCAGGCCAAAAAAGAAAAAGGGATCtaccatacagatgtccagattacgcttatccc  
tacgacgtgcctgattatgcataccatgatgtccccgactatgccTCGAGCGACTACAAAGACCATGAC  
GGTGATTATAAAGATCATGACATCGATTACAAGGATGACGATGACAAGGCTGCAGG  
AGGCGGTGGAAGCGGGaggggagtgaggtggaaccatctcccaggagacggggcgcaccttccc  
caagcgcggccagacctgcgtggtgcactacaccgggatgcttgaagatggaagaaatttgattcctcccgg  
gacagaaacaagcccttaagttatgctaggcaagcaggaggtatccgaggctgggaagaaggggtgcc  
agatgagtggtgagagccaaactgactatatctccagattatgctatggtgccactgggcaccaggc  
atcatcccaccatgccactctcgtcttcgatgtggagcttctaaaactggaGGATAA

## 7. JG676: CAG-human dLbCpf1(D832A)-NLS-3xHA-DmrA(X2)

Human codon optimized dLbCpf1: **bold**, NLS: *italic*, 3xHA: lower case, DmrA: lowercase and **bold**

ATGAGCAAGCTGGAGAAGTTTACAACTGCTACTCCCTGTCTAAGACCCTGAGGT  
TCAAGGCCATCCCTGTGGGCAAGACCAGGAGAACATCGACAATAAGCGGCTGC  
TGGTGGAGGACGAGAAGAGAGCCGAGGATTATAAGGGCGTGAAGAAGCTGCTG  
GATCGCTACTATCTGTCTTTTATCAACGACGTGCTGCACAGCATCAAGCTGAAGA  
ATCTGAACAATTACATCAGCCTGTTCCGGAAGAAAACCAGAACCGAGAAGGAGA  
ATAAGGAGCTGGAGAACCTGGAGATCAATCTGCGGAAGGAGATCGCCAAGGCCT  
TCAAGGGCAACGAGGGCTACAAGTCCCTGTTAAGAAGGATATCATCGAGACAA

TCCTGCCAGAGTTCCTGGACGATAAGGACGAGATCGCCCTGGTGAACAGCTTCA  
ATGGCTTTACCACAGCCTTCACCGGCTTCTTTGATAACAGAGAGAATATGTTTTCC  
GAGGAGGCCAAGAGCACATCCATCGCCTTCAGGTGTATCAACGAGAATCTGACC  
CGCTACATCTCTAATATGGACATCTTCGAGAAGGTGGACGCCATCTTTGATAAGC  
ACGAGGTGCAGGAGATCAAGGAGAAGATCCTGAACAGCGACTATGATGTGGAGG  
ATTTCTTTGAGGGCGAGTTCTTTAACTTTGTGCTGACACAGGAGGGCATCGACGT  
GTATAACGCCATCATCGGCGGCTTCGTGACCGAGAGCGGCGAGAAGATCAAGGG  
CCTGAACGAGTACATCAACCTGTATAATCAGAAAACCAAGCAGAAGCTGCCTAA  
GTTTAAGCCACTGTATAAGCAGGTGCTGAGCGATCGGGAGTCTCTGAGCTTCTAC  
GGCGAGGGCTATACATCCGATGAGGAGGTGCTGGAGGTGTTTAGAAACACCCTG  
AAACAAGAACAGCGAGATCTTCAGCTCCATCAAGAAGCTGGAGAAGCTGTTCAAG  
AATTTTGACGAGTACTCTAGCGCCGGCATCTTTGTGAAGAACGGCCCCGCCATCA  
GCACAATCTCCAAGGATATCTTCGGCGAGTGGAACGTGATCCGGGACAAGTGA  
ATGCCGAGTATGACGATATCCACCTGAAGAAGAAGGCCGTGGTGACCGAGAAGT  
ACGAGGACGATCGGAGAAAGTCCTTCAAGAAGATCGGCTCCTTTTCTCTGGAGCA  
GCTGCAGGAGTACGCCGACGCCGATCTGTCTGTGGTGGAGAAGCTGAAGGAGAT  
CATCATCCAGAAGGTGGATGAGATCTACAAGGTGTATGGCTCCTCTGAGAAGCTG  
TTCGACGCCGATTTTGTGCTGGAGAAGAGCCTGAAGAAGAACGACGCCGTGGTG  
GCCATCATGAAGGACCTGCTGGATTCTGTGAAGAGCTTCGAGAATTACATCAAGG  
CCTTCTTTGGCGAGGGCAAGGAGACAAACAGGGACGAGTCCTTCTATGGCGATTT  
TGTGCTGGCCTACGACATCCTGCTGAAGGTGGACCACATCTACGATGCCATCCGC  
AATTATGTGACCCAGAAGCCCTACTCTAAGGATAAGTTCAAGCTGTATTTTCAGAA  
CCCTCAGTTCATGGGCGGCTGGGACAAGGATAAGGAGACAGACTATCGGGCCAC  
CATCCTGAGATACGGCTCCAAGTACTATCTGGCCATCATGGATAAGAAGTACGCC  
AAGTGCTGCAGAAGATCGACAAGGACGATGTGAACGGCAATTACGAGAAGATC  
AACTATAAGCTGCTGCCCGGCCCTAATAAGATGCTGCCAAAGGTGTTCTTTTCTA  
AGAAGTGGATGGCCTACTATAACCCCAGCGAGGACATCCAGAAGATCTACAAGA  
ATGGCACATTCAAGAAGGGCGATATGTTTAACTGAATGACTGTCACAAGCTGAT  
CGACTTCTTTAAGGATAGCATCTCCCGGTATCCAAAGTGGTCCAATGCCTACGAT  
TTCAACTTTTCTGAGACAGAGAAGTATAAGGACATCGCCGGCTTTTACAGAGAGG  
TGGAGGAGCAGGGCTATAAGGTGAGCTTCGAGTCTGCCAGCAAGAAGGAGGTG  
GATAAGCTGGTGGAGGAGGGCAAGCTGTATATGTTCCAGATCTATAACAAGGACT  
TTTCCGATAAGTCTCACGGCACACCCAATCTGCACACCATGTACTIONCAAGCTGCT  
GTTTGACGAGAACAATCACGGACAGATCAGGCTGAGCGGAGGAGCAGAGCTGTT  
CATGAGGCGCGCCTCCCTGAAGAAGGAGGAGCTGGTGGTGCACCCAGCCAACTC  
CCCTATCGCCAACAAGAATCCAGATAATCCCAAGAAAACCACAACCCTGTCCTAC  
GACGTGTATAAGGATAAGAGGTTTTCTGAGGACCAGTACGAGCTGCACATCCCAA  
TCGCCATCAATAAGTGCCCCAAGAACATCTTCAAGATCAATACAGAGGTGCGCGT  
GCTGCTGAAGCACGACGATAACCCCTATGTGATCGGCATCGCCAGGGGCGAGCG  
CAATCTGCTGTATATCGTGGTGGTGGACGGCAAGGGCAACATCGTGGAGCAGTA  
TTCCCTGAACGAGATCATCAACAACCTTCAACGGCATCAGGATCAAGACAGATTAC  
CACTCTCTGCTGGACAAGAAGGAGAAGGAGAGGTTTCGAGGCCCGCCAGAAGT  
GACCTCCATCGAGAATATCAAGGAGCTGAAGGCCGGCTATATCTCTCAGGTGGT  
GCACAAGATCTGCGAGCTGGTGGAGAAGTACGATGCCGTGATCGCCCTGGAGGA  
CCTGAACTCTGGCTTTAAGAATAGCCGCGTGAAGGTGGAGAAGCAGGTGTATCA  
GAAGTTCGAGAAGATGCTGATCGATAAGCTGAACTACATGGTGGACAAGAAGTC  
TAATCCTTGTGCAACAGGGCGGCCCTGAAGGGCTATCAGATCACCAATAAGTTC  
GAGAGCTTTAAGTCCATGTCTACCCAGAACGGCTTCATCTTTTACATCCCTGCCTG  
GCTGACATCCAAGATCGATCCATCTACCGGCTTTGTGAACCTGCTGAAAACCAAG  
TATACCAGCATCGCCGATTCCAAGAAGTTCATCAGCTCCTTTGACAGGATCATGT  
ACGTGCCCGAGGAGGATCTGTTTCGAGTTGCCCTGGACTATAAGAAGTCTCTCG

CACAGACGCCGATTACATCAAGAAGTGGAAAGCTGTACTCCTACGGCAACCGGAT  
CAGAATCTTCCGGAATCCTAAGAAGAACAACGTGTTGACTGGGAGGAGGTGTG  
CCTGACCAGCGCCTATAAGGAGCTGTTCAACAAGTACGGCATCAATTATCAGCAG  
GGCGATATCAGAGCCCTGCTGTGCGAGCAGTCCGACAAGGCCTTCTACTCTAGCT  
TTATGGCCCTGATGAGCCTGATGCTGCAGATGCGGAACAGCATCACAGGCCGCA  
CCGACGTGGATTTTCTGATCAGCCCTGTGAAGAACTCCGACGGCATCTTCTACGA  
TAGCCGGAAGTATGAGGCCAGGAGAATGCCATCCTGCCAAAGAACGCCGACGC  
CAATGGCGCCTATAACATCGCCAGAAAGGTGCTGTGGGCCATCGGCCAGTTCAA  
GAAGGCCGAGGACGAGAAGCTGGATAAGGTGAAGATCGCCATCTCTAACAAGGA  
GTGGCTGGAGTACGCCAGACCAGCGTGAAGCACAAAAGGCCGGCCGACGAA  
AAAGGCCGGCCAGGCCAAAAAGAAAAAGGGATCCtaccatacagatgtccagattacgcttacc  
tacgacgtgcctgattatgataccatgatgtccccgactatgccTCGAGCGACTACAAAGACCATGAC  
GGTGATTATAAAGATCATGACATCGATTACAAGGATGACGATGACAAGGCTGCAGG  
AGGCCGTGGAAGCGGG**Gaggggagtcaggtggaaccatctcccaggagacggg**gcacctccc  
**caagcgcgccagacctgcgtggtg**cactacaccgggatgcttgaagatggaagaaatttgattcctcccgg  
gacagaaacaagcccttaagttatgctaggcaagcaggaggtgatccgaggctgggaagaaggggtgcc  
agatgagtggtgagagccaaactgactatatctccagattatgcctatggtgccactggcaccaggc  
atcatcccaccatgccactctcgtcttcgatgtggagcttctaaaactggaaGGTTCtaggggagtcaggt  
ggaaccatctcccaggagacggggcacctcccgaagcgcgccagacctgcgtggtgactacaccg  
ggatgcttgaagatggaagaaatttgattcctcccgggacagaaacaagcccttaagttatgctaggcaagc  
aggaggtgatccgaggctgggaagaaggggtgccagatgagtggtgagagccaaactgactatatc  
tccagattatgcctatggtgccactggcaccaggcatcatcccaccacatgccactctcgtcttcgatgtggag  
cttctaaaactggaaGGATAA

## 8. JG693: CAG-human dLbCpf1(D832A)-NLS-3xHA-DmrA(X3)

Human codon optimized dLbCpf1: **bold**, NLS: *italic*, 3xHA: lower case, DmrA: lowercase and **bold**

ATGAGCAAGCTGGAGAAGTTTACAAACTGCTACTCCCTGTCTAAGACCCTGAGGT  
TCAAGGCCATCCCTGTGGGCAAGACCCAGGAGAACATCGACAATAAGCGGCTGC  
TGGTGGAGGACGAGAAGAGAGCCGAGGATTATAAGGGCGTGAAGAAGCTGCTG  
GATCGCTACTATCTGTCTTTTATCAACGACGTGCTGCACAGCATCAAGCTGAAGA  
ATCTGAACAATTACATCAGCCTGTTCCGGAAGAAAACCAGAACCAGAGAAGGAGA  
ATAAGGAGCTGGAGAACCCTGGAGATCAATCTGCGGAAGGAGATCGCCAAGGCCT  
TCAAGGGCAACGAGGGCTACAAGTCCCTGTTAAGAAGGATATCATCGAGACAA  
TCCTGCCAGAGTTCCTGGACGATAAGGACGAGATCGCCCTGGTGAACAGCTTCA  
ATGGCTTTACCACAGCCTTCACCGGCTTCTTTGATAACAGAGAGAATATGTTTTCC  
GAGGAGGCCAAGAGCACATCCATCGCCTTCAGGTGTATCAACGAGAATCTGACC  
CGCTACATCTCTAATATGGACATCTTCGAGAAGGTGGACGCCATCTTTGATAAGC  
ACGAGGTGCAGGAGATCAAGGAGAAGATCCTGAACAGCGACTATGATGTGGAGG  
ATTTCTTTGAGGGCGAGTTCTTTAACTTTGTGCTGACACAGGAGGGCATCGACGT  
GTATAACGCCATCATCGGCGGCTTCGTGACCGAGAGCGGCGAGAAGATCAAGGG  
CCTGAACGAGTACATCAACCTGTATAATCAGAAAACCAAGCAGAAGCTGCCTAA  
GTTTAAGCCACTGTATAAGCAGGTGCTGAGCGATCGGGAGTCTCTGAGCTTCTAC  
GGCGAGGGCTATACATCCGATGAGGAGGTGCTGGAGGTGTTTAGAAACACCCTG  
AACAAGAACAGCGAGATCTTCAGCTCCATCAAGAAGCTGGAGAAGCTGTTCAAG  
AATTTTGACGAGTACTCTAGCGCCGGCATCTTTGTGAAGAACGGCCCCGCCATCA



GCACAATCTCCAAGGATATCTTCGGCGAGTGGAACGTGATCCGGGACAAGTGGA  
ATGCCGAGTATGACGATATCCACCTGAAGAAGAAGGCCGTGGTGACCGAGAAGT  
ACGAGGACGATCGGAGAAAGTCCTTCAAGAAGATCGGCTCCTTTTCTCTGGAGCA  
GCTGCAGGAGTACGCCGACGCCGATCTGTCTGTGGTGGAGAAGCTGAAGGAGAT  
CATCATCCAGAAGGTGGATGAGATCTACAAGGTGTATGGCTCCTCTGAGAAGCTG  
TTCGACGCCGATTTTGTGCTGGAGAAGAGCCTGAAGAAGAACGACGCCGTGGTG  
GCCATCATGAAGGACCTGCTGGATTCTGTGAAGAGCTTCGAGAATTACATCAAGG  
CCTTCTTTGGCGAGGGCAAGGAGACAAACAGGGACGAGTCCTTCTATGGCGATTT  
TGTGCTGGCCTACGACATCCTGCTGAAGGTGGACCACATCTACGATGCCATCCGC  
AATTATGTGACCCAGAAGCCCTACTCTAAGGATAAGTTCAAGCTGTATTTTCAGAA  
CCCTCAGTTCATGGGCGGCTGGGACAAGGATAAAGGAGACAGACTATCGGGCCAC  
CATCCTGAGATACGGCTCCAAGTACTATCTGGCCATCATGGATAAGAAGTACGCC  
AAGTGCTGCAGAAGATCGACAAGGACGATGTGAACGGCAATTACGAGAAGATC  
AACTATAAGCTGCTGCCCGGCCCTAATAAGATGCTGCCAAAGGTGTTCTTTTCTA  
AGAAGTGGATGGCCTACTATAACCCCAGCGAGGACATCCAGAAGATCTACAAGA  
ATGGCACATTCAAGAAGGGCGATATGTTTAACTGAATGACTGTCACAAGCTGAT  
CGACTTCTTTAAGGATAGCATCTCCCGGTATCCAAAGTGGTCCAATGCCTACGAT  
TTCAACTTTTCTGAGACAGAGAAGTATAAGGACATCGCCGGCTTTTACAGAGAGG  
TGGAGGAGCAGGGCTATAAGGTGAGCTTCGAGTCTGCCAGCAAGAAGGAGGTG  
GATAAGCTGGTGGAGGAGGGCAAGCTGTATATGTTCCAGATCTATAACAAGGACT  
TTTCCGATAAGTCTCACGGCACACCCAATCTGCACACCATGTACTTCAAGCTGCT  
GTTTGACGAGAACAATCACGGACAGATCAGGCTGAGCGGAGGAGCAGAGCTGTT  
CATGAGGCGCGCCTCCCTGAAGAAGGAGGAGCTGGTGGTGCACCCAGCCAACTC  
CCCTATCGCCAACAAGAATCCAGATAATCCCAAGAAAACCACAACCCTGTCCTAC  
GACGTGTATAAGGATAAGAGGTTTTCTGAGGACCAGTACGAGCTGCACATCCCAA  
TCGCCATCAATAAGTGCCCCAAGAACATCTTCAAGATCAATACAGAGGTGCGCGT  
GCTGCTGAAGCACGACGATAACCCCTATGTGATCGGCATCGCCAGGGGCGAGCG  
CAATCTGCTGTATATCGTGGTGGTGGACGGCAAGGGCAACATCGTGGAGCAGTA  
TTCCCTGAACGAGATCATCAACAACCTTCAACGGCATCAGGATCAAGACAGATTAC  
CACTCTCTGCTGGACAAGAAGGAGAAGGAGAGGTTTCGAGGCCCGCCAGAAGT  
GACCTCCATCGAGAATATCAAGGAGCTGAAGGCCGGCTATATCTCTCAGGTGGT  
GCACAAGATCTGCGAGCTGGTGGAGAAGTACGATGCCGTGATCGCCCTGGAGGA  
CCTGAACTCTGGCTTTAAGAATAGCCGCGTGAAGGTGGAGAAGCAGGTGTATCA  
GAAGTTCGAGAAGATGCTGATCGATAAGCTGAACTACATGGTGGACAAGAAGTC  
TAATCCTTGTGCAACAGGGCGGCGCCCTGAAGGGCTATCAGATCACCAATAAGTTC  
GAGAGCTTTAAGTCCATGTCTACCCAGAACGGCTTCATCTTTTACATCCCTGCCTG  
GCTGACATCCAAGATCGATCCATCTACCGGCTTTGTGAACCTGCTGAAAACCAAG  
TATACCAGCATCGCCGATTCCAAGAAGTTCATCAGCTCCTTTGACAGGATCATGT  
ACGTGCCCGAGGAGGATCTGTTGAGTTTGGCCTGGACTATAAGAACTTCTCTCG  
CACAGACGCCGATTACATCAAGAAGTGAAGCTGTACTCCTACGGCAACCGGAT  
CAGAATCTTCCGGAATCCTAAGAAGAACAACGTGTTGACTGGGAGGAGGTGTG  
CCTGACCAGCGCCTATAAGGAGCTGTTCAACAAGTACGGCATCAATTATCAGCAG  
GGCGATATCAGAGCCCTGCTGTGCGAGCAGTCCGACAAGGCCTTCTACTCTAGCT  
TTATGGCCCTGATGAGCCTGATGCTGCAGATGCGGAACAGCATCACAGGCCGCA  
CCGACGTGGATTTTCTGATCAGCCCTGTGAAGAACTCCGACGGCATCTTCTACGA  
TAGCCGGAACATGAGGCCAGGAGAATGCCATCCTGCCAAAGAACGCCGACGC  
CAATGGCGCCTATAACATCGCCAGAAAGGTGCTGTGGGCCATCGGCCAGTTCAA  
GAAGGCCGAGGACGAGAAGCTGGATAAGGTGAAGATCGCCATCTCTAACAAGGA  
GTGGCTGGAGTACGCCAGACCAGCGTGAAGCACAAAAGGCCGGCGGCCACGAA  
AAAGGCCGGCCAGGCCAAAAAAGAAAAGGGATTCtaccatacagatgtccagattacgctatccc  
tacgacgtgcctgattatgcataccatgatgtccccgactatgccTCGAGCGACTACAAAGACCATGAC

GGTGATTATAAAGATCATGACATCGATTACAAGGATGACGATGACAAGGCTGCAGG  
AGGCGGTGGAAGCGGG**Gaggggagtg**caggtgga**aac**ctctcccag**gagacggg**cg**cac**ctccc  
caag**cgcg**g**ccagac**ctgc**gtg**gtgc**actacacc**gggatg**cttga**agatgga**aga**aattg**attc**ctccc**g**  
gacagaa**acaag**ccctta**agttat**g**ctag**gcaagcag**gaggt**gatcc**gag**gctg**gga**aga**aggg**gtgccc  
agatgag**tg**gg**tcagag**ag**ccaa**actg**actata**tctccag**attat**gc**ctat**g**gtg**cc**actg**g**gc**acc**ag**gc  
atcatccc**acc**acatg**ccact**ctc**gtct**tcgat**gtg**gag**ctt**ctaa**aa**actgga**ag**gat**ctg**gtg**gaa**GCGG**Ga**  
ggggag**tg**cag**gtg**ga**aac**ctctcccag**gagac**gg**gc**cac**ctccc**aag**cg**g**ccag**ac**ctg**cg**tg**  
gtgc**actacacc**gggatg**cttga**agatgga**aga**aattg**attc**ctccc**gg**acagaa**acaag**ccctta**ag**ttta  
tg**ctag**gcaagcag**gag**gtgatcc**gag**gctg**gga**aga**aggg**gtgcccagatgag**tg**gg**tcagag**agcc  
aa**actg**actatctccag**attat**gc**ctat**g**gtg**cc**actg**g**gc**acc**ag**gc**at**ccc**acc**acatg**ccact**ctc**g**  
t**cttc**gat**gtg**gag**ctt**ctaa**aa**ctg**gaa**GTT**CT**ag**ggg**ag**tg**cag**gtg**ga**aac**ctctcccag**gag**ac**g**  
gg**gc**cac**ctccc**aag**cg**g**ccag**ac**ctg**cg**tg**gtg**ctac**acc**gg**gatg**cttga**agatgga**aga**aatt  
tg**attc**ctccc**gg**acagaa**acaag**ccctta**ag**ttatg**ctag**gcaagcag**gag**gtgatcc**gag**gctg**gga**ag  
a**aggg**gtgcccagatgag**tg**gg**tcagag**ag**ccaa**actg**actata**tctccag**attat**gc**ctat**g**gtg**cc**actg**  
gg**cacc**ag**gc**atcatccc**acc**acatg**ccact**ctc**gtct**tcgat**gtg**gag**ctt**ctaa**aa**ctg**gaa**GGATAA

## 9. YET1000: CAG-human dLbCpf1(D832A)-NLS-3xHA-DmrA(X4)

Human codon optimized dLbCpf1: **bold**, NLS: *italic*, 3xHA: lower case, DmrA: lowercase and **bold**

ATGAGCAAGCTGGAGAAGTTTACAAACTGCTACTCCCTGTCTAAGACCCTGAGGT  
TCAAGGCCATCCCTGTGGGCAAGACCCAGGAGAACATCGACAATAAGCGGCTGC  
TGGTGGAGGACGAGAAGAGAGCCGAGGATTATAAGGGCGTGAAGAAGCTGCTG  
GATCGCTACTATCTGTCTTTTATCAACGACGTGCTGCACAGCATCAAGCTGAAGA  
ATCTGAACAATTACATCAGCCTGTTCCGGAAGAAAACCAGAACCAGAGAAGGAGA  
ATAAGGAGCTGGAGAACCCTGGAGATCAATCTGCGGAAGGAGATCGCCAAGGCCT  
TCAAGGGCAACGAGGGCTACAAGTCCCTGTTAAGAAGGATATCATCGAGACAA  
TCCTGCCAGAGTTCCTGGACGATAAGGACGAGATCGCCCTGGTGAACAGCTTCA  
ATGGCTTTACCACAGCCTTACC**GGCTTCTTTGATAACAGAGAGAATATGTTTTCC**  
GAGGAGGCCAAGAGCACATCCATCGCCTTCAGGTGTATCAACGAGAATCTGACC  
CGCTACATCTCTAATATGGACATCTTCGAGAAGGTGGACGCCATCTTTGATAAGC  
ACGAGGTGCAGGAGATCAAGGAGAAGATCCTGAACAGCGACTATGATGTGGAGG  
ATTTCTTTGAGGGCGAGTTCTTTAACTTTGTGCTGACACAGGAGGGGCATCGACGT  
GTATAACGCCATCATCGGCGGCTTCGTGACCGAGAGCGGCGAGAAGATCAAGGG  
CCTGAACGAGTACATCAACCTGTATAATCAGAAAACCAAGCAGAAGCTGCCTAA  
GTTTAAGCCACTGTATAAGCAGGTGCTGAGCGATCGGGAGTCTCTGAGCTTCTAC  
GGCGAGGGCTATACATCCGATGAGGAGGTGCTGGAGGTGTTTAGAAACACCCTG  
ACAAGAACAGCGAGATCTTCAGCTCCATCAAGAAGCTGGAGAAGCTGTTCAAG  
AATTTTGACGAGTACTCTAGCGCCGGCATCTTTGTGAAGAACGGCCCCGCCATCA  
GCACAATCTCCAAGGATATCTTCGGCGAGTGGAACGTGATCCGGGACAAGTGGA  
ATGCCGAGTATGACGATATCCACCTGAAGAAGAAGGCCGTGGTGACCGAGAAGT  
ACGAGGACGATCGGAGAAAGTCTTCAAGAAGATCGGCTCCTTTTCTCTGGAGCA  
GCTGCAGGAGTACGCCGACGCCGATCTGTCTGTGGTGGAGAAGCTGAAGGAGAT  
CATCATCCAGAAGGTGGATGAGATCTACAAGGTGTATGGCTCCTCTGAGAAGCTG  
TTCGACGCCGATTTTGTGCTGGAGAAGAGCCTGAAGAAGAACGACGCCGTGGTG  
GCCATCATGAAGGACCTGCTGGATTCTGTGAAGAGCTTCGAGAATTACATCAAGG  
CCTTCTTTGGCGAGGGCAAGGAGACAAACAGGGACGAGTCCTTCTATGGCGATTT  
TGTGCTGGCCTACGACATCCTGCTGAAGGTGGACCACATCTACGATGCCATCCGC

AATTATGTGACCCAGAAGCCCTACTCTAAGGATAAGTTCAAGCTGTATTTTCAGAA  
CCCTCAGTTCATGGGCGGCTGGGACAAGGATAAGGAGACAGACTATCGGGCCAC  
CATCCTGAGATACGGCTCCAAGTACTATCTGGCCATCATGGATAAGAAGTACGCC  
AAGTGCCTGCAGAAGATCGACAAGGACGATGTGAACGGCAATTACGAGAAGATC  
AACTATAAGCTGCTGCCCGGCCCTAATAAGATGCTGCCAAAGGTGTTCTTTTCTA  
AGAAGTGGATGGCCTACTATAACCCAGCGAGGACATCCAGAAGATCTACAAGA  
ATGGCACATTCAAGAAGGGCGATATGTTTAACTGAATGACTGTCACAAGCTGAT  
CGACTTCTTTAAGGATAGCATCTCCCGGTATCCAAAGTGGTCCAATGCCTACGAT  
TTCAACTTTTCTGAGACAGAGAAGTATAAGGACATCGCCGGCTTTTACAGAGAGG  
TGGAGGAGCAGGGCTATAAGGTGAGCTTCGAGTCTGCCAGCAAGAAGGAGGTG  
GATAAGCTGGTGGAGGAGGGCAAGCTGTATATGTTCCAGATCTATAACAAGGACT  
TTTCCGATAAGTCTCACGGCACACCCAATCTGCACACCATGTAAGCTGCT  
GTTTGACGAGAACAATCACGGACAGATCAGGCTGAGCGGAGGAGCAGAGCTGTT  
CATGAGGGCGCGCTCCCTGAAGAAGGAGGAGCTGGTGGTGCACCCAGCCAACTC  
CCCTATCGCCAACAAGAATCCAGATAATCCCAAGAAAACCACAACCTGTCCTAC  
GACGTGTATAAGGATAAGAGGTTTTCTGAGGACCAGTACGAGCTGCACATCCCAA  
TCGCCATCAATAAGTGCCCAAGAACATCTTCAAGATCAATACAGAGGTGCGCGT  
GCTGCTGAAGCACGACGATAACCCCTATGTGATCGGCATCGCCAGGGGCGAGCG  
CAATCTGCTGTATATCGTGGTGGTGGACGGCAAGGGCAACATCGTGGAGCAGTA  
TTCCCTGAACGAGATCATCAACAACCTTCAACGGCATCAGGATCAAGACAGATTAC  
CACTCTCTGCTGGACAAGAAGGAGAAGGAGAGGTTTCGAGGCCCGCCAGAAGTG  
GACCTCCATCGAGAATATCAAGGAGCTGAAGGCCGGCTATATCTCTCAGGTGGT  
GCACAAGATCTGCGAGCTGGTGGAGAAGTACGATGCCGTGATCGCCCTGGAGGA  
CCTGAACTCTGGCTTTAAGAATAGCCGCGTGAAGGTGGAGAAGCAGGTGTATCA  
GAAGTTCGAGAAGATGCTGATCGATAAGCTGAACTACATGGTGGACAAGAAGTC  
TAATCCTTGTGCAACAGGCGGCGCCCTGAAGGGCTATCAGATCACCATAAGTTC  
GAGAGCTTTAAGTCCATGTCTACCCAGAACGGCTTCATCTTTTACATCCCTGCCTG  
GCTGACATCCAAGATCGATCCATCTACCGGCTTTGTGAACCTGCTGAAAACCAAG  
TATACCAGCATCGCCGATTCCAAGAAGTTCATCAGCTCCTTTGACAGGATCATGT  
ACGTGCCCGAGGAGGATCTGTTTCGAGTTTGGCCCTGGACTATAAGAACTTCTCTCG  
CACAGACGCCGATTACATCAAGAAGTGAAGCTGTAAGCTCCTACGGCAACCGGAT  
CAGAATCTTCCGGAATCCTAAGAAGAACAACGTGTTTCGACTGGGAGGAGGTGTG  
CCTGACCAGCGCCTATAAGGAGCTGTTCAACAAGTACGGCATCAATTATCAGCAG  
GGCGATATCAGAGCCCTGCTGTGCGAGCAGTCCGACAAGGCCTTCTACTCTAGCT  
TTATGGCCCTGATGAGCCTGATGCTGCAGATGCGGAACAGCATCACAGGCCGCA  
CCGACGTGGATTTTCTGATCAGCCCTGTGAAGAACTCCGACGGCATCTTCTACGA  
TAGCCGGAAGTATGAGGCCAGGAGAATGCCATCCTGCCAAAGAACGCCGACGC  
CAATGGCGCCTATAACATCGCCAGAAAGGTGCTGTGGGCCATCGGCCAGTTCAA  
GAAGGCCGAGGACGAGAAGCTGGATAAGGTGAAGATCGCCATCTCTAACAAGGA  
GTGGCTGGAGTACGCCAGACCAGCGTGAAGCACAAAAGGCCGGCGGCCACGAA  
AAAGGCCGGCCAGGCCAAAAAAGAAAAGGGATCtaccatacagatgtccagattacgctatccc  
tacgacgtgcctgattatgcataccatgatgtccccgactatgccTCGAGCGACTACAAAGACCATGAC  
GGTGATTATAAAGATCATGACATCGATTACAAGGATGACGATGACAAGGCTGCAGG  
AGGCGGTGGAAGCGGGGGAaggggagtgagggtggaaccatctcccaggagacggggcacc  
ttcccaagcgcggccagacctgcgtggtgactacaccgggatgcttgaagatggaagaaatttgattcctc  
cgggacagaaacaagcccttaagttatgctaggcaagcaggaggtgatccgaggctgggaagaaggggtg  
cccagatgagtggtgagagagccaaactgactatctccagattatgcctatggtgccactgggcccag  
gcatcatcccaccatgccactctcgtcttcgatgtggagcttctaaaactggaaGGTTCTaggggagtgca  
ggtggaaccatctcccaggagacggggcgacctcccaagcgcggccagacctgcgtggtgactacac  
cgggatgcttgaagatggaagaaattgattcctccgggacagaaacaagcccttaagttatgctaggcaa  
gcaggaggtgatccgaggctgggaagaaggggtgcccagatgagtggtgagagagccaaactgactat

atctccagattatgcctatggtgccactgggcacccaggcatcatcccaccacatgccactctcgtcttcgatg  
gagcttctaaaactggaaGGGGGAAGCGGTGGAAGCGGGaggggagtgaggtggaaaccatctc  
cccaggagacggg'gcaccttccccagcgcggccagacctgcgtggtgcactacaccgggatgcttgaag  
atggaaagaaatttgattcctcccgggacagaacaagcccttaagtattatgctaggcaagcaggaggtgatcc  
gaggctgggaagaaggggtgcccagatgagtggtgggtcagagagccaaactgactatatctccagattatgcc  
tatggtgccactgggcacccaggcatcatcccaccacatgccactctcgtcttcgatgtggagcttctaaaactgg  
aaGGTTCTaggggagtgaggtggaaaccatctcccaggagacggg'gcaccttccccagcgcggcc  
agacctgcgtggtgcactacaccgggatgcttgaagatggaaagaaatttgattcctcccgggacagaacaag  
cccttaagtattatgctaggcaagcaggaggtgatccgaggctgggaagaaggggtgcccagatgagtggtgg  
tcagagagccaaactgactatatctccagattatgcctatggtgccactgggcacccaggcatcatcccaccaca  
tgccactctcgtcttcgatgtggagcttctaaaactggaaGGATAA

## 10. BPK3082: U6-Lb-crRNA-BsmBIcassette

U6 promoter: **bold**, Lb crRNA: *italic*, BsmBI sites: lower case, U6 terminator: *italic* and **bold**

**TGTACAAAAAAGCAGGCTTTAAAGGAACCAATTCAGTCGACTGGATCCGGTACCA  
AGGTCGGGCAGGAAGAGGGCCTATTTCCCATGATTCCTTCATATTTGCATATACG  
ATACAAGGCTGTTAGAGAGATAATTAGAATTAATTTGACTGTAACACAAAGATAT  
TAGTACAAAATACGTGACGTAGAAAGTAATAATTTCTTGGGTAGTTTGCAGTTTTA  
AAATTATGTTTTAAAATGGACTATCATATGCTTACCGTAACTTGAAAGTATTTTCGAT  
TTCTTGGCTTTATATATCTTGTGGAAAGGACGAAACACCGAATTTCTACTAAGTGTA  
GATGgagacgATTAATGcgtctcTTTTTTT**

## REFERENCES

1. Kleinstiver, B.P. et al. Genome-wide specificities of CRISPR-Cas Cpf1 nucleases in human cells. *Nature biotechnology* **34**, 869-874 (2016).
